# Supplementary material
Source: MDPI journal article supplement (https://www.mdpi.com/2305-7084/8/1/15)
Supplement: s1 [file s1]

## Supporting information

for

### Heat-induced Fragmentation and Adhesive Behaviour of Gold Nanowires for Surface-Enhanced Raman Scattering Substrates

By Annamarija Trausa <sup>1,\*</sup>, Ciro Federiko Tipaldi <sup>1</sup>, Liga Ignatane <sup>1</sup>, Boris Polyakov <sup>1</sup>, Sven Oras <sup>2</sup>, Edgars Butanovs <sup>1,2</sup>, Edgars Vanags <sup>1</sup> and Krisjanis Smits<sup>1</sup>

<sup>1</sup> Institute of Solid State Physics, University of Latvia, Riga, LV-1063 Latvia; issp@cfi.lu.lv

<sup>2</sup> Institute of Technology, University of Tartu, Nooruse 1, Tartu, 50411 Estonia; info@tuit.ut.ee

\* Correspondence: annamarija.trausa@cfi.lu.lv; Tel.: +371 22425312

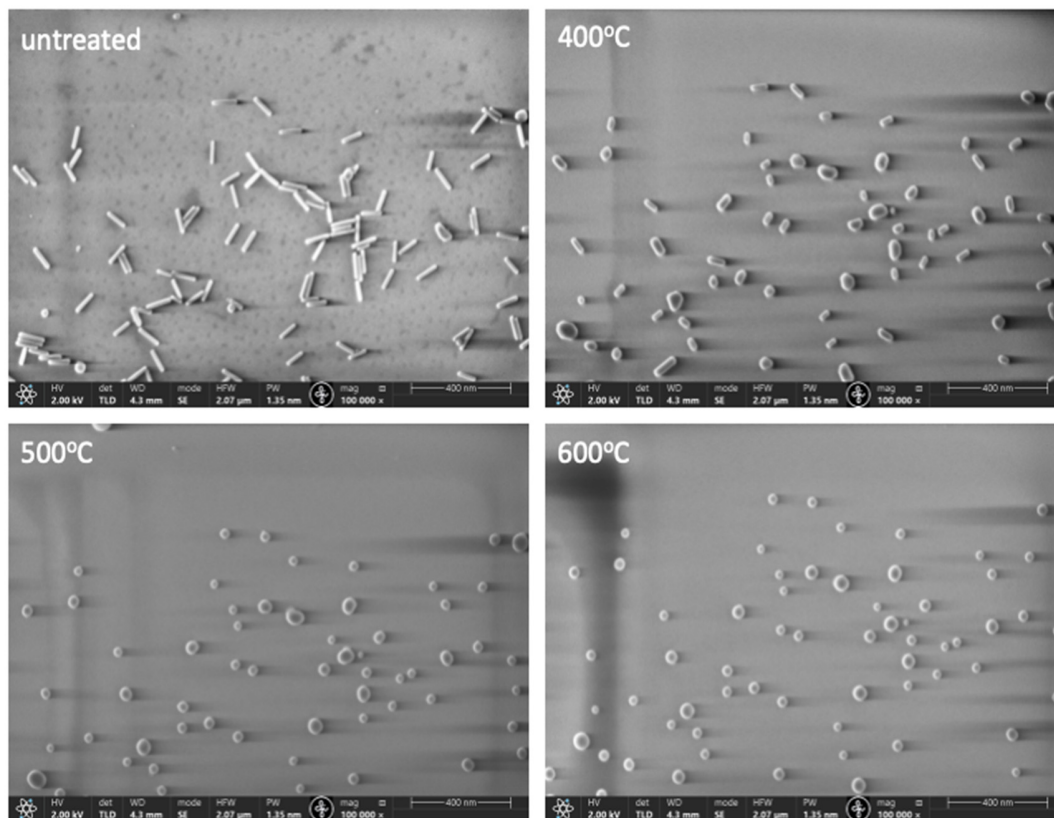

**Figure S1:** Unprocessed SEM images of Au NRs. Images are given as an example (many more images were used for histogram creation).

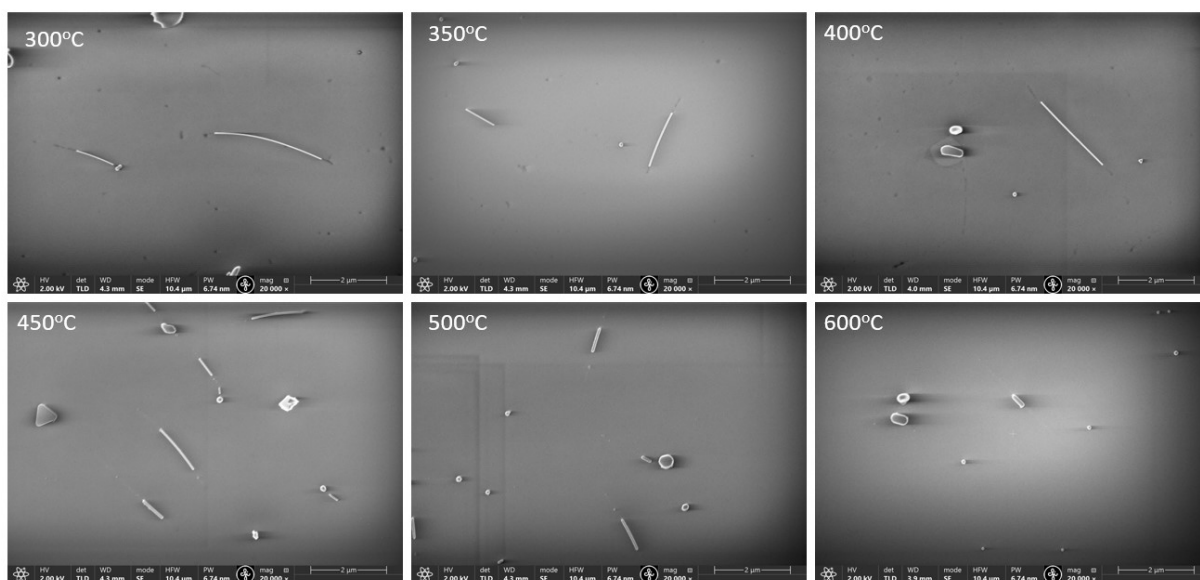

**Figure S2:** Unprocessed SEM images of Au NWs. Images are given as an example (many more images were used for histogram creation).

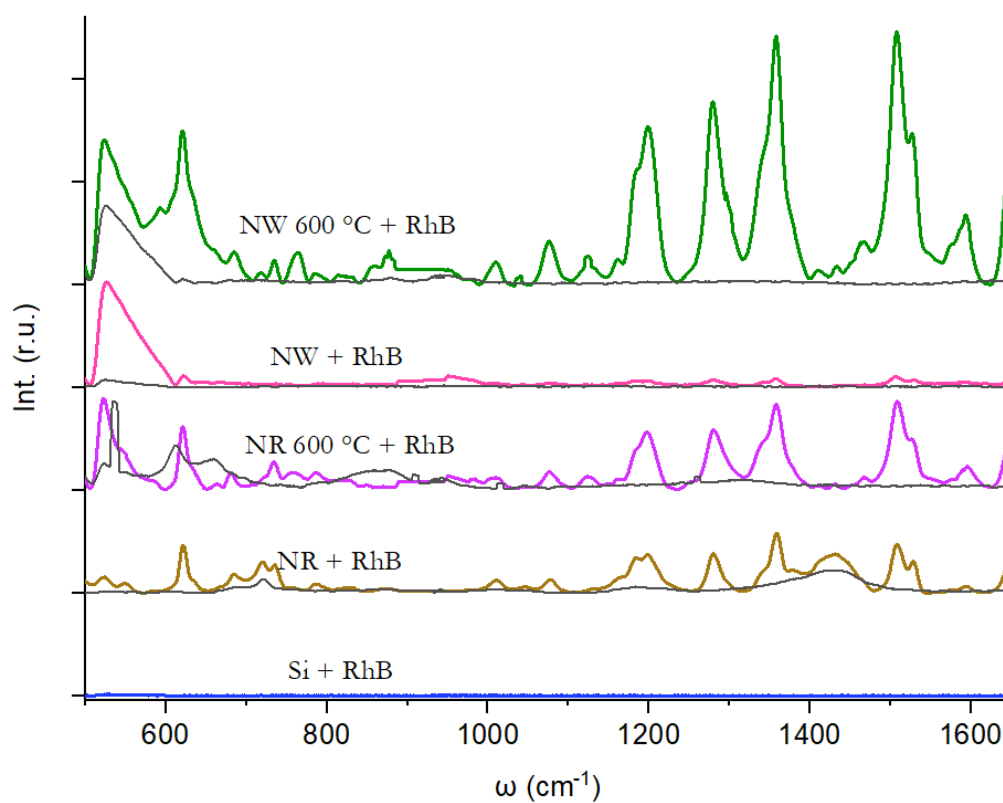

**Figure S3:** Raman scattering from Rhodamine B molecules on oxidised Si wafer with untreated and thermally treated Au nanostructures. The grey spectra indicate background Raman scattering from each SERS substrate without Rhodamine B.
